# Supplementary material for: Ecofriendly Biosorbents Produced from Cassava Solid Wastes: Sustainable Technology for the Removal of Cd2+, Pb2+, and Crtotal
Source: Hindawi journal article supplement (doi:10.1155/2022/5935712), 2022-01-01
Supplement: f1 [file 5935712.f1.docx]

***Supplementary materials for:***

**Eco-friendly Biosorbents Produced from Cassava Solid Wastes: Sustainable Technology for the Removal of Cd2+, Pb2+, and Crtotal**

Daniel SCHWANTES1, Affonso Celso GONÇALVES JUNIOR2, Henrique Alipio PERINA3, César Ricardo Teixeira TARLEY4, Douglas Cardoso DRAGUNSKI5,

Elio CONRADI JUNIOR2, Juliano ZIMMERMANN2

1*Pontifícia Universidad Católica de Chile. Avenida Vicuña Mackenna nº 4860, Santiago, Macul, Región Metropolitana, Chile.

2Universidade Estadual do Oeste do Paraná. Rua Universitária, nº 1619, Universitário, Cascavel, State of Paraná, Brazil.

3Pontifícia Universidade Católica do Paraná. Avenida União, nº 500, Toledo, State of Paraná, Brazil.

4Universidade Estadual de Londrina. Rod. Celso Garcia Cid, State of Paraná, 445 Km 380, Campus Universitário, Londrina, State of Paraná, Brazil.

5Universidade Estadual do Oeste do Paraná. Rua da Faculdade, nº 645, Jardim La Salle, Toledo, State of Paraná, Brazil.

ORCID: 0000-0002-2251-5887. E-mail of the corresponding author: [daniel_schwantes@hotmail.com](mailto:daniel_schwantes@hotmail.com)

ORCID: 0000-0002-1699-1545. E-mail: [affonso133@hotmail.com](mailto:affonso133@hotmail.com)

E-mail: [henrique.perina@pucpr.br](mailto:henrique.perina@pucpr.br)

ORCID: 0000-0002-8685-1556. E-mail: [tarley@uel.br](mailto:tarley@uel.br)

ORCID: 0000-0001-7870-097X. E-mail: [dcdragunski@gmail.com](mailto:dcdragunski@gmail.com)

ORCID: 0000-0003-3982-8262. E-mail: [elio.conradi@outlook.com](mailto:elio.conradi@outlook.com)

ORCID: 0000-0002-4240-8683. E-mail: [juliaanozimmermann@gmail.com](mailto:juliaanozimmermann@gmail.com)

***Additional information regarding the Introduction section – toxicity and environmental problems related to the heavy metals Cd, Pb, and Cr***

Regarding toxic metals, Cd stands out as the 7th ranked substance in the “ATSDR 2019 Substance Priority List” (ATSDR, 2019), is still generated as a byproduct of the mining and industrialization of Zn, Cu, and Pb byproducts (Kubier *et al.,* 2019). For humans, one of the main risks associated with Cd is the consumption of water contaminated with this metal, either *in natura* or in the use of this water in the manufacture of beverages and food preparation (Hamid *et al.,* 2019).

Cd has a particular potential to change the activity of some transcription factors and thus, provokes the development and progression of tumors (Đukić-Ćosić *et al.,* 2020). ATSDR (ATSDR, 2020a) reports that human exposure to Cd can affect the following organ systems: Cardiovascular, gastrointestinal, neurological, urinary system (especially kidneys), reproductive and respiratory (from the nose to the lungs), damaging the organs, generally during their developing.

Other problematic contamination issues occur with Pb. Due to severe health consequences on the human population, Pb in gasoline, paints and ceramic products, caulking, and pipe solder has been dramatically reduced in recent years (Levin *et al.,* 2020). This metal is highly stable in the environment and highly toxic to living beings. It is currently ranked as the 2nd most dangerous element according to the US Environmental Protection Agency’s priority list (ATSDR, 2020b) and to the “ATSDR 2019 Substance Priority List” (ATSDR, 2019). The systems affected by Pb are cardiovascular, gastrointestinal, hematological, structural, neurological, ocular, renal, and reproductive systems, and there is still interference of Pb in the formation of practically all human body organs (ATSDR, 2020b).

Not such toxic as the two aforementioned, but also causing many problems; the contamination of Cr in water resources is a global severe problem because it may cause toxic effects on living organisms when over the drinking water guideline (Tiwari *et al.,* 2019). Its contamination in groundwater and shallow waters is due more to anthropogenic contamination than to the geogenic origin. Industrial applications, including tanning, electroplating, metal finishing, industrial water cooling, mining, petroleum refining, paper pulp production, nuclear facilities, and manufacturing of pigments, dyes, textiles, carpets, magnetic tapes, among others, are mainly responsible for Cr contamination in groundwater (Tiwari *et al.,* 2019). Chromium human exposure can affect the following systems: Immunological, renal, and respiratory. Besides, by inhalation, hexavalent chromium is a real human carcinogenic substance (ATSDR, 2020c).

Although Cr6+ is much more toxic than its trivalent form, Cr3+ can cause severe problems by combining several macromolecules, including genetic material inside the cytosol, and ultimately exposing toxic and mutagenic alterations to chromium toxicity. Cr is taken up either through the gastrointestinal tract or respiratory tract. The amount varies depending upon the medium and the form of Cr (Bakshi and Panigrahi, 2018).

***Additional materials regarding section 2.3.6 Data Analysis***

Some additional information regarding all mathematical and empirical models is shown in Table S1.

**Table S1.** Some of the mathematical models (equations or expressions) used in this research.

| Basic equations |  | q(t) (mg g-1): the amount absorbed in the equilibrium per mass unit of adsorbent at instant t; C(t) (mg L-1): concentration in the equilibrium at instant t; C0 (mg L-1): initial concentration of metal in solution; m (g): mass of adsorbent; V (L): volume (Borba *et al.* 2012). |
| --- | --- | --- |
|  | R (%): metal removal percentage; Ce (mg L-1): concentration in the equilibrium; C0 (mg L-1): initial concentration of metal in solution. |
| **Kinetics** |  |  |
| Pseudo-first order  (Lagergren, 1898) |  | qe and qt (mg g-1): the amount of adsorbate retained per gram of adsorbent in equilibrium per time (min); k1 (min.-1): the rate constant of pseudo-first order. |
| Pseudo-second order  (Ho and Mckay, 1999) |  | qe (mg g-1): the amount of adsorbate retained per gram of adsorbent in equilibrium (min); k2 (g mg-1 min.-1): the rate constant of pseudo-second order. |
| **Equilibrium** | | |
| Langmuir  (1917) |  | Ce (mg L-1): concentration in the equilibrium; qe (mg g-1): the amount absorbed in the equilibrium per mass unit of adsorbent; qLangmuir (mg g-1): maximum adsorption capacity of the adsorbent predicted by Langmuir; KLangmuir (L mg-1): interaction forces between adsorbent and adsorbate; RLangmuir (dimensionless): related to the favorability of the isotherm, if RLangmuir = 0, irreversible process; 0 < RLangmuir < 1, favorable adsorption; RLangmuir = 1, linear adsorption; RLangmuir > 1, unfavorable adsorption (impossible situation, because kLangmuir is never < 0); a: angular coefficient of the linear plot Ce/qe versus Ce; Co = initial concentration (studied from 5 to 200 mg L-1). |
| Freundlich  (1906) |  | Ce (mg L-1): concentration in the equilibrium; qe (mg g-1): the amount absorbed in the equilibrium per mass unit of adsorbent; KFreundlich [mg g−1 (mg L−1)−1/n] is a distribution coefficient, predicting the adsorption intensity and a the distribution of the energy and heterogeneity of adsorbate sites; n (dimensionless): Freundlich parameters. |
| Sips  (1948) |  | qe (mg g-1): the amount absorbed in the equilibrium per mass unit of adsorbent; qSips (mg g-1): maximum adsorption capacity of the adsorbent predicted by Sips; nSips (dimensionless): related to the heterogeneity of adsorbent material (Sips); KSips (L mg-1): adsorption affinity constant. |
| Temkin and Pyzhev  (1940) |  | qe (mg g-1): the amount absorbed in the equilibrium per mass unit of adsorbent; ATP (L mg-1): Temkin-Pyzhev equilibrium binding constant; bTP: Temkin-Pyzhev isotherm constant (dimensionless); R: universal gas constant (8.314 J mol-1 K-1); T: the temperature at 298 K; the parameter B (J mol-1) is a constant related to the heat of sorption, which can be obtained by the expression B = RT/bTP (Temkin, 1940). |
| Liu et al.,  (2013) |  | qe (mg g-1); the amount absorbed in the equilibrium per mass unit of adsorbent; Kg: Liu equilibrium constant (L mg−1); nLiu: dimensionless exponent of the Liu equation; qLiu: maximum adsorption capacity of the adsorbent predicted by Liu model (mg g−1). Contrary to the Sips isotherm, nL could assume any positive values (Liu et al. 2013). |
| Redlich-Peterson (1959) |  | Ce (mg L-1): concentration in the equilibrium; qe (mg g-1): the amount absorbed in the equilibrium per mass unit of adsorbent; KRP (L g-1) is the Redlich-Peterson model isotherm constant; aRP (L mg-1): is the Redlich-Peterson model constant; βRP (dimensionless): is the Redlich-Peterson model exponent (Redlich-Peterson, 1959). |
| Toth  (1971) |  | Ce (mg L-1): concentration in the equilibrium; qe (mg g-1): the amount absorbed in the equilibrium per mass unit of adsorbent; qToth (mg g-1) maximum adsorption capacity of the adsorbent predicted by Toth; bToth (dimensionless) is the Toth model constant; and nToth (dimensionless): is the Toth model exponent (Toth, 1971). |
| Khan et al.,(1996)  Khan et al., (1997) |  | Ce (mg L-1): concentration in the equilibrium; qe (mg g-1): the amount absorbed in the equilibrium per mass unit of adsorbent; qKhan (mg g-1) maximum adsorption capacity of the adsorbent predicted by Khan; bKhan (L mg-1): is the Khan model constant; and aKhan (dimensionless) is the Khan model exponent (Kahn *et al.* 1996 and 1997). |
| **Desorption studies** | | |
| Desorption rate |  | D (%): desorption rate in acid elution; C(des) (mg L-1): desorption concentration of metal in the equilibrium; Ce (ads) (mg L-1): adsorption concentration of metal in equilibrium. |
| **Thermodynamics** |  |  |
| ∆Gº, ∆Hº, ∆Sº |  | The change in entropy (ΔS°), enthalpy (ΔH°) and Gibbs Free Energy (ΔG°) are estimated according to Manfrin et al., (2021). |

***Additional materials regarding section 3.1 Characterization of the Cassava Natural Adsorbents***

Table S2 summarizes the FT-IR before and after the adsorption of Cd2+, Pb2+, and Crtotal, which is a strong indicator of -the functional groups responsible for heavy metal adsorption by cassava natural adsorbents.

**Table S2.** Summary of the infrared spectroscopy absorption by frequency regions (Figure 2) from before and after the adsorption of Cd2+, Pb2+, and Crtotal.

| Adsorbents | Before Cd2+ adsorption | After Cd2+ adsorption | Before Pb2+ adsorption | After Pb2+ adsorption | Before Crtotal adsorption | After Crtotal adsorption | Functional group | | | | |
| --- | --- | --- | --- | --- | --- | --- | --- | --- | --- | --- | --- |
| CASS-BK | 769 | missing | 768 | missing | 769 | 769 | medium to strong |  | C=C | bending | alkene |
| 1030 | 1030 | 1018 | 1018 | 1020 | 1020 | medium to strong | broad | CO-O-CO | stretching | anhydride |
| 1160 | 1160 | 1157 | 1157 | 1154 | 1154 | strong |  | C-O | stretching | secondary alcohol, aliphatic ether |
| 1440-1662 | 1440-1662 | 1355-1471 | 1355-1471 | 1369-1488 | 1369-1488 | medium to strong |  | C-H, O-H | bending | alkane, carboxylic acid, alcohol |
|  |  | 1662 | 1662 | 1646 | 1646 | medium to strong |  | C=O, C-N, C=C, and N-H | stretching | primary amide, imine/oxime, conjugated ketone, alkene, amine |
|  |  | 1733 | 1733 | 1734 | 1734 | strong |  | C=O | stretching | conjugated anhydride, esters, aldehyde |
|  |  | 2852 | 2852 | 2852 | 2852 | medium |  | C-H | stretching | aldehyde |
| 2918 | 2918 | 2920 | 2920 | 2924 | 2924 | medium |  | C-H | stretching | alkane |
| 3338-3452 | 3338-3452 | 3338-3452 | 3338-3452 | 3277-3552 | 3277-3552 | medium to strong | broad | O-H and N-H | stretching | alcohol, primary amine, aliphatic primary amine, secondary amine. |
| CASS-BA | 769 | missing | 770 | missing | 765 | 765 | medium to strong |  | C=C | bending | alkene |
| 1030 | missing | 1039 | missing | 1035 | missing | medium to strong | broad | CO-O-CO | stretching | anhydride |
| 1157 | missing | 1155 | missing | 1155 | missing | strong |  | C-O | stretching | secondary alcohol, aliphatic ether |
| 1240-1662 | missing | 1355-1471 | 1355-1471 | 1369-1488 | 1369-1488 | medium to strong |  | C-H, O-H | bending | alkane, carboxylic acid, alcohol |
| 1620-1642 | 1620-1642 | 1662 | 1662 | 1646 | 1646 | medium to strong |  | C=O, C-N, C=C, and N-H | stretching | primary amide, imine/oxime, conjugated ketone, alkene, amine |
| 1733-1744 | 1733-1744 | 1733 | 1733 | 1734 | 1734 | strong |  | C=O | stretching | conjugated anhydride, esters, aldehyde |
| 2930 | missing | 2930 | missing | 2925 | missing | medium |  | C-H | stretching | alkane |
| 3338-3452 | 3338-3452 | 3338-3452 | 3338-3452 | 3277-3552 | 3277-3552 | medium to strong | broad | O-H and N-H | stretching | alcohol, primary amine, aliphatic primary amine, secondary amine. |
| CASS-BB |  |  | 1039 | missing |  |  | medium to strong | broad | CO-O-CO | stretching | anhydride |
| 1240-1662 | 1240-1662 | 1355-1471 | 1355-1471 | 1369-1488 | 1369-1488 | medium to strong |  | C-H, O-H | bending | alkane, carboxylic acid, alcohol |
| 1620-1642 | 1620-1642 | 1662 | 1662 | 1646 | 1646 | medium to strong |  | C=O, C-N, C=C, and N-H | stretching | primary amide, imine/oxime, conjugated ketone, alkene, amine |
| 1733-1744 | missing | 1733 | 1733 | 1734 | 1734 | strong |  | C=O | stretching | conjugated anhydride, esters, aldehyde |
| 3338-3452 | 3338-3452 | 3338-3451 | 3338-3451 | 3277-3552 | 3277-3552 | medium to strong | broad | O-H and N-H | stretching | alcohol, primary amine, aliphatic primary amine, secondary amine |

***Sources:*** LibreTexts (2020), Silverstein et al., (2014), Angin and Şensöz (2014), Schulz and Baranska, (2007), Adapa et al., (2011).

**
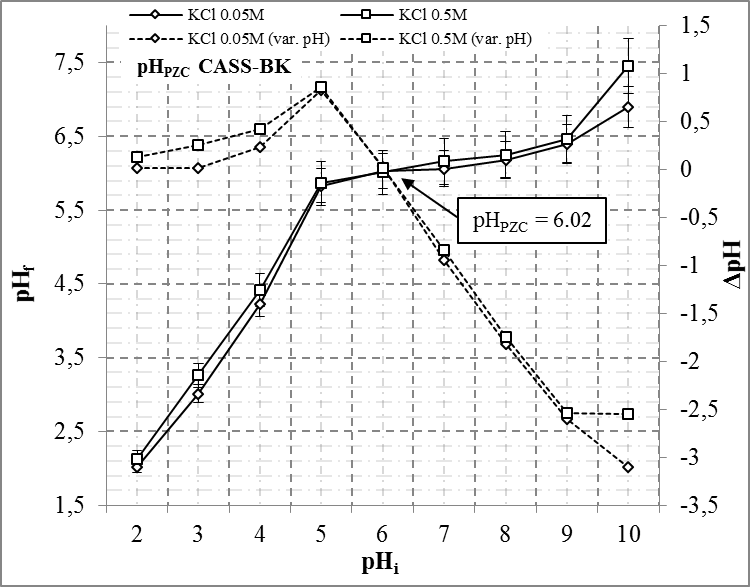

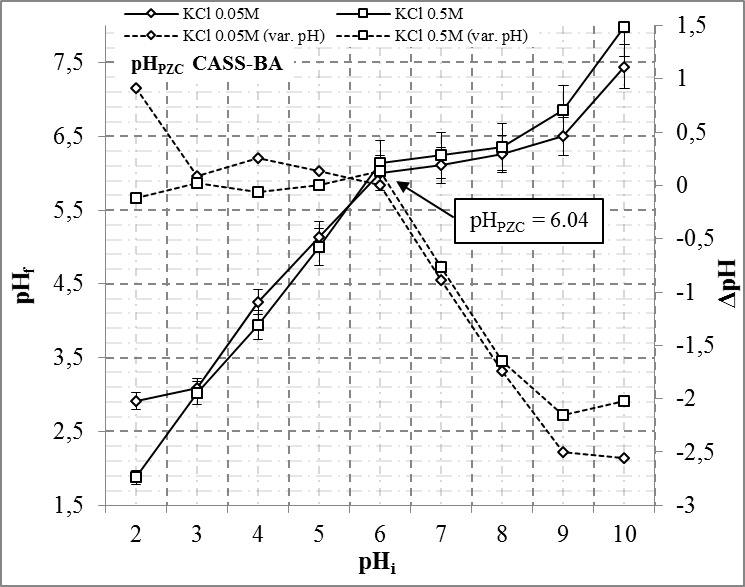

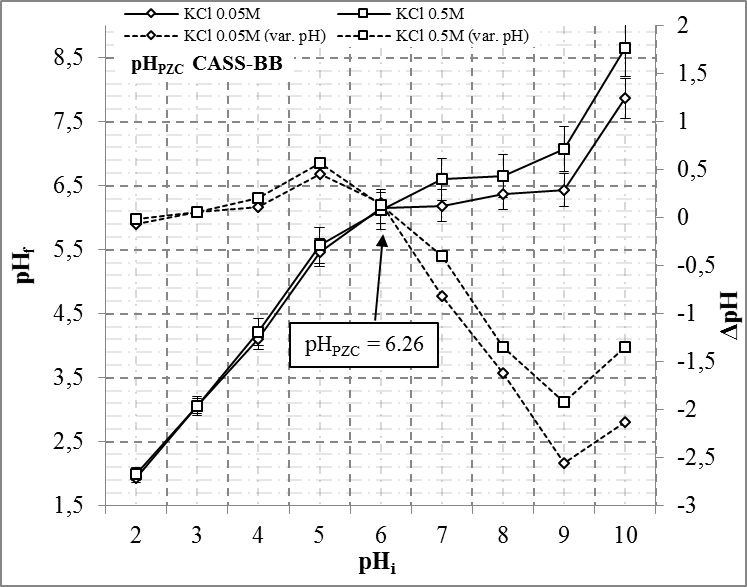
**

**Figure S1.** pHPZC obtained with KCl 0.5 M for CASS-BK (6.07), CASS-BA (6.23), and CASS-BB (6.37); and with KCl 0.05 M for CASS-BK (5.98), CASS-BA (5.85), and CASS-BB (6.15). Inside the graph are highlighted the obtained average values for pHPCZ.

***Additional materials regarding section 3.2.1 pH and Adsorbent Dose Studies***

The theoretical speciation of Cd2+, Pb2+, Cr3+, and Cr6+ (Figure S2) indicates that in pH > 6.0, there is a higher possibility of forming insoluble forms, which would be highly non-appreciated by our study because such ions would not be available for adsorption processes.

**
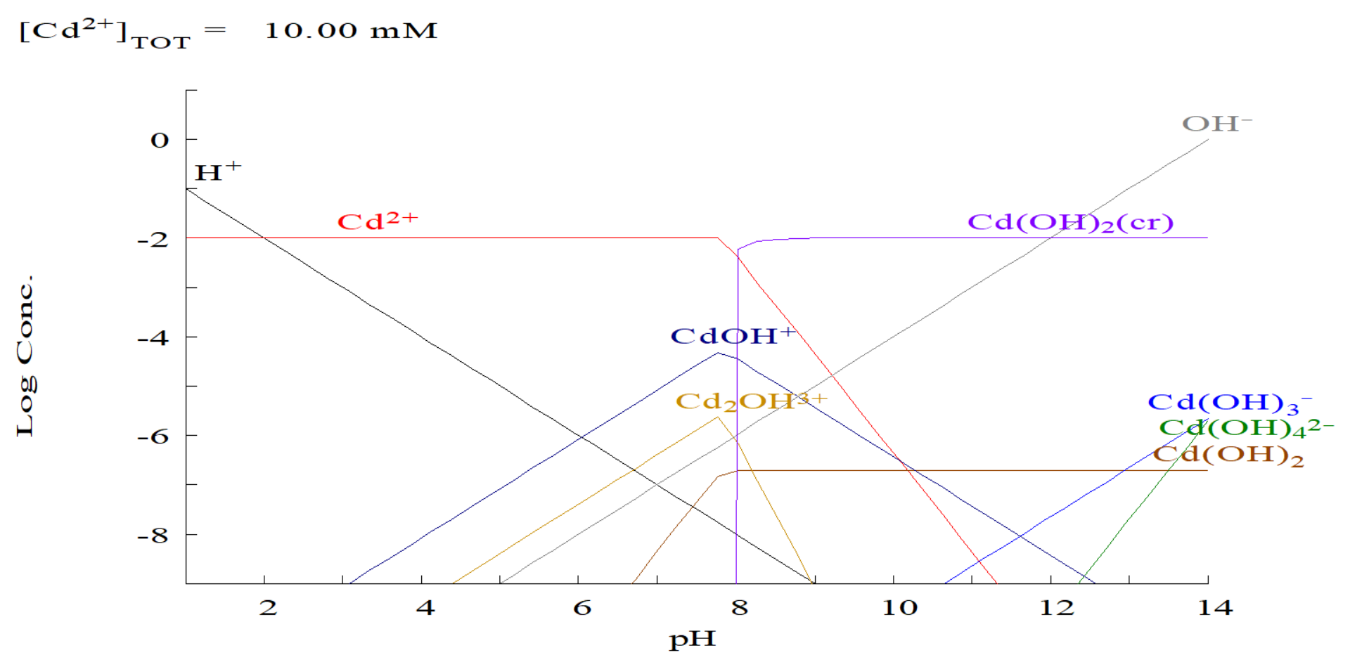
**

**
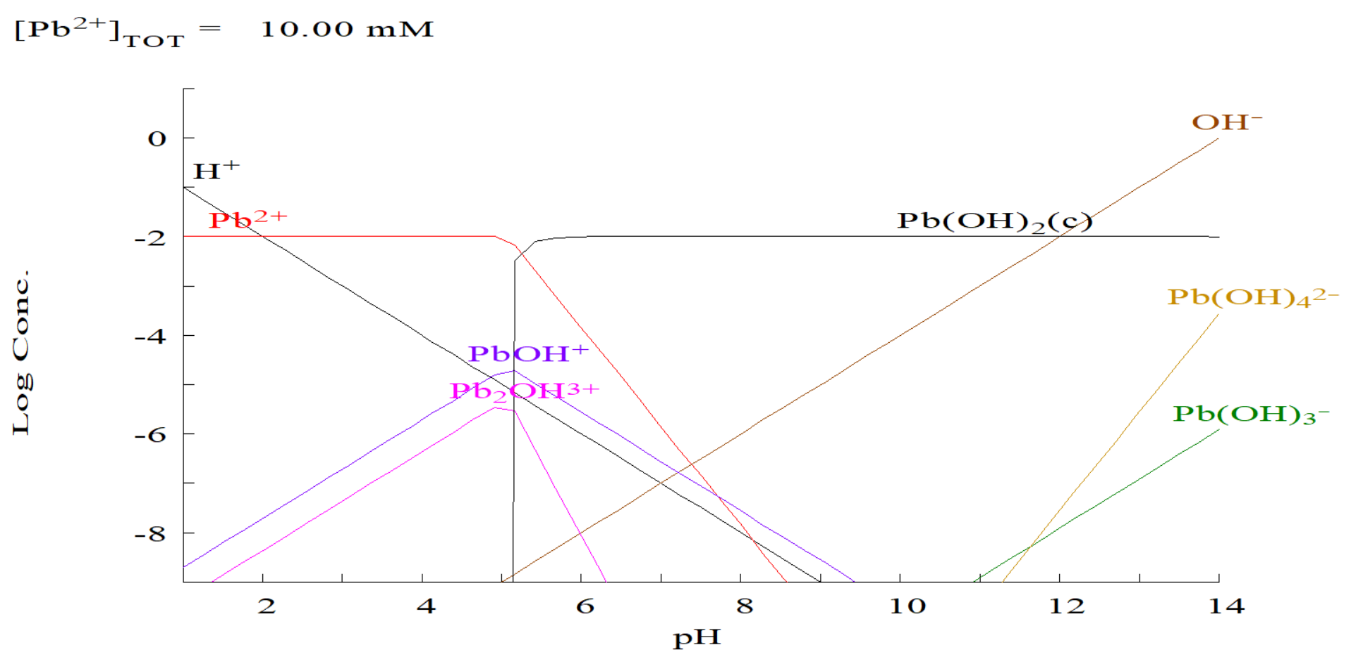

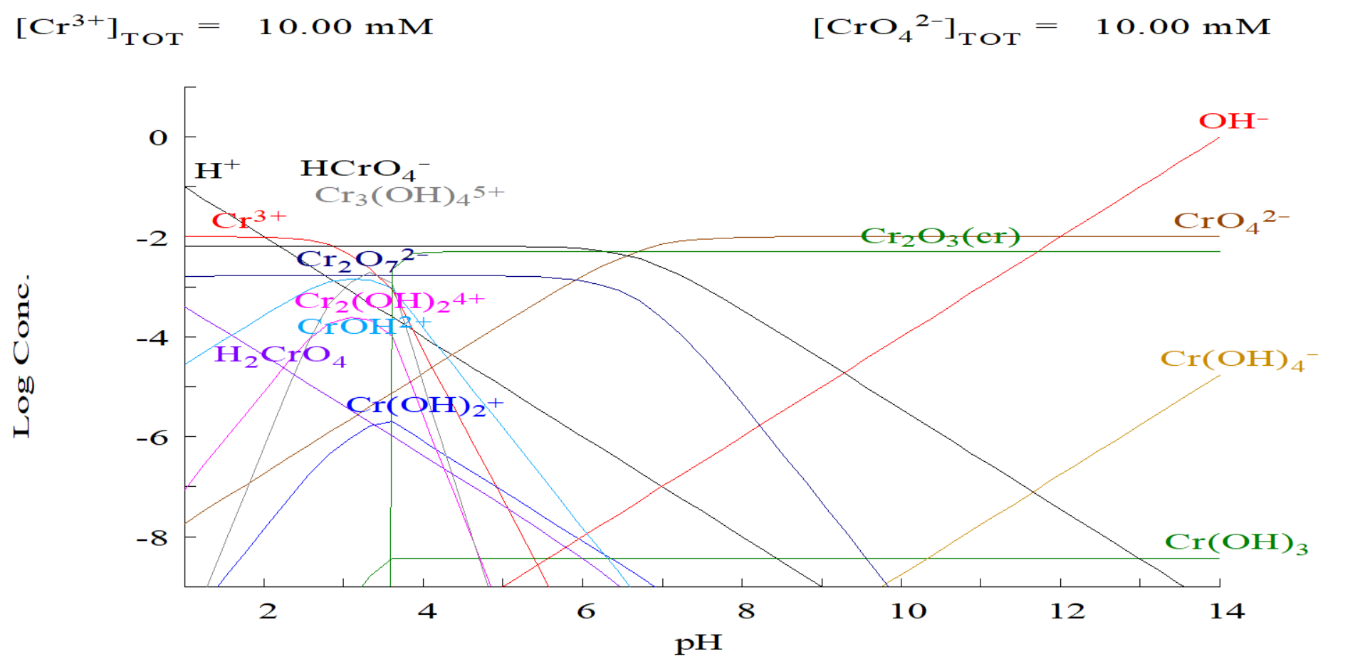
**

**Figure S2.** Theoretical speciation of Cd2+, Pb2+, and Crtotal. Source: Software Hydromedusa, (Puigdomenech, 2018). Evaluated conditions: pH varying from 1.0 to 14.0; [ions] = 0.1 M.

**Table S3.** Equations regarding the influence of pH and the adsorbent doses on removing Cd2+, Pb2+, and Crtotal by CASS-BK, CASS-BA, and CASS-BB, and the graphical interpretation of Figure 3.

| Removal rate by each biosorbent (%) | Equations | Ideal conditions  (Graphic interpretation of Figure 5) |
| --- | --- | --- |
| CASS-BK removal of Cd2+ | z = 87.4920 + 0.7375x + 1.038y – 0.0192x2 – 0.0279xy – 0.0911y2 | 3.5 < pH < 6.0, 10 to 22 g L-1 = 95% |
| CASS-BK removal of Pb2+ | z = 81.2470 – 0.5047x + 6.5681y – 0.0001x2 + 0.0745xy – 0.8522y2 | 3.5 < pH < 4.5, 2 to 10 g L-1 = 92% |
| CASS-BK removal of Crtotal | z = 58.10310 – 0.1019x + 11.471y + 0.0093x2 – 0.0514xy – 1.2142y2 | 4.0 < pH < 5.0, 2 to 8 g L-1 = 84% |
| CASS-BA removal of Cd2+ | z = 73.8050 + 0.9002x + 5.7277y – 0.0175x2 – 0.0433xy – 0.475y2 | 4.0 < pH < 6.0, 14 to 22 g L-1 = 97% |
| CASS-BA removal of Pb2+ | z = 92.5695 – 0.0017x + 2.6315y + 0.0001x2 – 0.0079xy – 0.2483y2 | 3.5 < pH < 5.5, 2 to 12 g L-1 = 99% |
| CASS-BA removal of Crtotal | z = 71.2308 + 1.9182x + 3.527y – 0.0357x2 – 0.11xy – 0.3106y2 | 3.8 < pH < 4.8, 12 to 22 g L-1 = 94% |
| CASS-BB removal of Cd2+ | z = 90.672 + 0.4664x + 1.7899y – 0.0094x2 – 0.0242xy – 0.1297y2 | 4.0 < pH < 6.0, 14 to 22 g L-1 = 99.5% |
| CASS-BB removal of Pb2+ | z = 95.7728 + 0.1625x + 1.6331y – 0.0004x2 – 0.0394xy – 0.1569y2 | 3.5 < pH < 6.5, 2 to 26 g L-1 = 99% |
| CASS-BB removal of Crtotal | z = 92.8654 + 0.6773x – 1.8063y – 0.0158x2 – 0.0197xy + 0.2186y2 | 3.5 < pH < 7.0, 14 to 20 g L-1 = 94% |

**Note:** x corresponds to adsorbent doses (evaluated from 4.0 to 24.0 g L-1), y corresponds to pH of the solution (evaluated from 4.0 to 7.0 for Cd2+ and Pb2+, and from 4.0 to 6.0 for Crtotal), and z corresponds to the removal rate (of Cd2+, Pb2+, or Crtotal).

**Table S4.** Analysis of variance (ANOVA) for the removal of Cd, Pb, and Cr, for the causes of variation “Adsorbent” (CASS-BK, CASS-BA, and CASS-BB), “Adsorbent Doses” (4.0 to 24.0 g L-1), and the “pH of the solution” (from 4.0 to 7.0).

| Cd2+ removal | | | | | Pb2+ removal | | | | | Crtotal removal | | | | |
| --- | --- | --- | --- | --- | --- | --- | --- | --- | --- | --- | --- | --- | --- | --- |
| Causes of Variation | DF | MS | F value | Significance | Causes of Variation | DF | MS | F value | Significance | Causes of Variation | DF | MS | F value | Significance |
| Adsorbent | 2 | 155.10 |  | <0.001 | Adsorbent | 2 | 738.89 | 977.33 | <0.001 | Adsorbent | 2 | 753.68 | 194.68 | <0.001 |
| Doses | 5 | 13.26 |  | <0.001 | Doses | 5 | 3.29 | 4.35 | 0.0021 | Doses | 5 | 14.21 | 3.67 | 0.0079 |
| pH | 3 | 1.93 |  | 0.0163 | pH | 3 | 42.18 | 55.79 | <0.001 | pH | 2 | 12.64 | 3.26 | 0.0485 |
| Adsorbent x pH | 6 | 0.86 |  | 0.1465 | Adsorbent x pH | 6 | 8.81 | 11.65 | <0.001 | Adsorbent x pH | 4 | 4.78 | 1.23 | 0.3109 |
| Error | 55 | 0.52 |  |  | Error | 55 | 0.75 |  |  | Error | 40 | 3.87 |  |  |
| Total | 71 |  |  |  | Total | 71 |  |  |  | Total | 53 |  |  |  |
| CV (%) | 0.75 |  |  |  | CV (%) | 0.75 |  |  |  | CV (%) | 2.21 |  |  |  |
| Average | 96.01 |  |  |  | Average | 96.01 |  |  |  | Average | 88.87 |  |  |  |
| Number of observations | 72 |  |  |  | Number of observations | 72 |  |  |  | Number of observations | 54 |  |  |  |

**Note:** DF – Degrees of freedom; MS – Mean squares; CV – Coefficient of variation.

**Table S5.** Tukey’s range test (at 5% of significance) for the removal of Cd2+, Pb2+, and Crtotal, in the evaluated pH ranges (4.0 to 7.0) and cassava adsorbents (CASS-BK, CASS-BA, and CASS-BB).

| pH ranges | Mean removal of Cd2+ (%) | Mean removal of Pb2+ (%) | Mean removal of Crtotal (%) | Tukey for adsorbents | Mean removal of Cd2+ (%) | Mean removal of Pb2+ (%) | Mean removal of Crtotal (%) |
| --- | --- | --- | --- | --- | --- | --- | --- |
| 4.0 | 95.97 ab | 96.12 b | 93.68 a | CASS-BK | 93.84 c | 89.18 b | 81.52 c |
| 5.0 | 96.35 a | 97.50 a | 93.58 a | CASS-BA | 95.38 b | 98.62 a | 91.38 b |
| 6.0 | 96.13 ab | 94.51 c | 93.88 a | CASS-BB | 98.81 a | 98.95 a | 93.71 a |
| 7.0 | 95.57 b | 94.19 c |  | HSD | 0.50 | 0.60 | 1.59 |
| HSD | 0.63 | 0.76 | 2.76 |  |  |  |  |

**Note:** HDS - honestly significant difference.

**Table S6.** Regression analysis coefficients for removing Cd2+, Pb2+, and Crtotal by the cassava biosorbents.

| Cd2+ Removal | | | | | Pb2+ Removal | | | | | Crtotal Removal | | | | |
| --- | --- | --- | --- | --- | --- | --- | --- | --- | --- | --- | --- | --- | --- | --- |
| Causes of Variation | DF | MS | F value | Significance | Causes of Variation | DF | MS | F value | Significance | Causes of Variation | DF | MS | F value | Significance |
| x (linear regression) | 1 | 30.30 | 59.65 | <0.001 | x (linear regression) | 1 | 15.41 | 20.39 | <0.001 | x (linear regression) | 1 | 46.76 | 12.07 | 0.001 |
| x2 (quadratic regression) | 1 | 26.97 | 52.01 | <0.001 | x2 (quadratic regression) | 1 | 0.0008 | 0.001 | 0.974 | x2 (quadratic regression) | 1 | 17.10 | 4.41 | 0.042 |
| Deviation | 3 | 2.80 | 5.40 | <0.001 | deviation | 3 | 0.35 | 0.46 | 0.711 | deviation | 3 | 2.41 | 0.62 | 0.604 |
| error | 55 | 0.52 |  |  | error | 55 | 0.75 |  |  | error | 40 | 3.87 |  |  |

**Table S7.** Tukey’s range test for the interaction between the causes of variation “Adsorbent” (CASS-BK, CASS-BA, and CASS-BB) within every pH value (4.0, 5.0, 6.0, and 7.0) for the removal of Cd2+, Pb2+, and Crtotal.

|  | Removal of Cd2+ | | | Removal of Pb2+ | | | Removal of Crtotal | | |
| --- | --- | --- | --- | --- | --- | --- | --- | --- | --- |
| pH values | CASS-BK | CASS-BA | CASS-BB | CASS-BK | CASS-BA | CASS-BB | CASS-BK | CASS-BA | CASS-BB |
| 4.0 | 98.66 a | 95.08 ab | 94.18 a | 99.58 a | 98.35 b | 90.43 b | 93.68 a | 92.40 a | 82.51 a |
| 5.0 | 98.86 a | 95.83 ab | 94.36 a | 100.00 a | 99.96 a | 92.53 a | 93.58 a | 91.58 a | 82.33 ab |
| 6.0 | 99.01 a | 95.88 a | 93.50 a | 98.23 b | 97.78 b | 87.53 c | 93.88 a | 90.18 a | 79.73 b |
| 7.0 | 98.68 a | 94.73 b | 93.31 a | 97.98 b | 98.38 b | 86.21 c |  |  |  |
| HSD | 1.10 | | | 1.33 | | | 2.76 | | |

**Note:** HDS - honestly significant difference.

A general comparison for the removal percentage of Cd2+, Pb2+, and Crtotal, for cassava adsorbents, evaluated pH range, and the adsorbent doses are shown in Figure S1.

**Figure S3.** Averages obtained for the study on cassava adsorbents (CASS-BK, CASS-BA, BASS-BB) and their interaction with the pH of the solution (of Cd2+, Pb+2, and Crtotal), and the adsorbent doses. Experimental conditions: Adsorbent doses tested from 4.0 to 24 g L-1, pH evaluated from 4.0 to 7.0, stirring at 160 rpm, at 298 K for 1.5 h.

***Additional materials regarding section 3.2.3 Equilibrium Studies and Side-by-Side Comparison (Activated Carbon), and the reusability of the materials in other new adsorption cycles***

Table S3 shows us the ANOVA results for R2 analysis of constructed isotherms (Figure S4) for the adsorption of Cd2+, Pb2+, and Crtotal by the cassava adsorbents.

**Table S8.** ANOVA results on the goodness of the fit for the constructed isotherms.

| Sources of variation | DF | MS | F value | Significance |
| --- | --- | --- | --- | --- |
| Empirical model | 9 | 0.0215 | 5.192 | <0.001 |
| Error | 100 | 0.0041 |  |  |
| Total | 109 |  |  |  |
| CV (%) | 6.70 |  |  |  |
| Average | 0.9608 |  |  |  |
| Number of observations | 110 |  |  |  |

**Table S9.** Tukey’s range test (at 5% significance) on the goodness of the fit for Cd2+, Pb2+, and Crtotal adsorption isotherms.

| **Nonlinear models** | **R2 means** | **Standard deviation** |
| --- | --- | --- |
| **Toth** | 0.8457 b | 0.1757 |
| **Freundlich** | 0.9321 ab | 0.0635 |
| **Langmuir** | 0.9594 a | 0.0375 |
| **Temkin and Pyzhev** | 0.9632 a | 0.0285 |
| **Khan** | 0.9843 a | 0.0109 |
| **Sips** | 0.9862 a | 0.0073 |
| **Liu** | 0.9863 a | 0.0074 |
| **Redlich-Peterson** | 0.9887 a | 0.0066 |
| HSD | 0.0888 |  |

**Note:** HDS - honestly significant difference.

**Figure S4.** Adsorption isotherms for Cd2+ (from a to d), Pb2+ (from e to g) and Crtotal (from h to k) removal using cassava-based adsorbents CASS-BK, CASS-BA, and CASS-BB. Experimental Conditions: Adsorbent dose of 8.0 g L-1, pH of 5.5, stirring at 160 rpm for 60 min, at 298 K, heavy metal concentration varying from 5 to 200 mg L-1.
